# Supplementary material for: Band gap and defect engineering of bismuth vanadate using La, Ce, Zr dopants to obtain a photoelectrochemical system for ultra-sensitive detection of glucose in blood serum
Source: Royal Society of Chemistry journal article supplement (doi:10.1039/d2dt03304f), 2023-01-01
Supplement: d2dt03304f1.pdf [file d2dt03304f1.pdf]

**Supporting Information:**

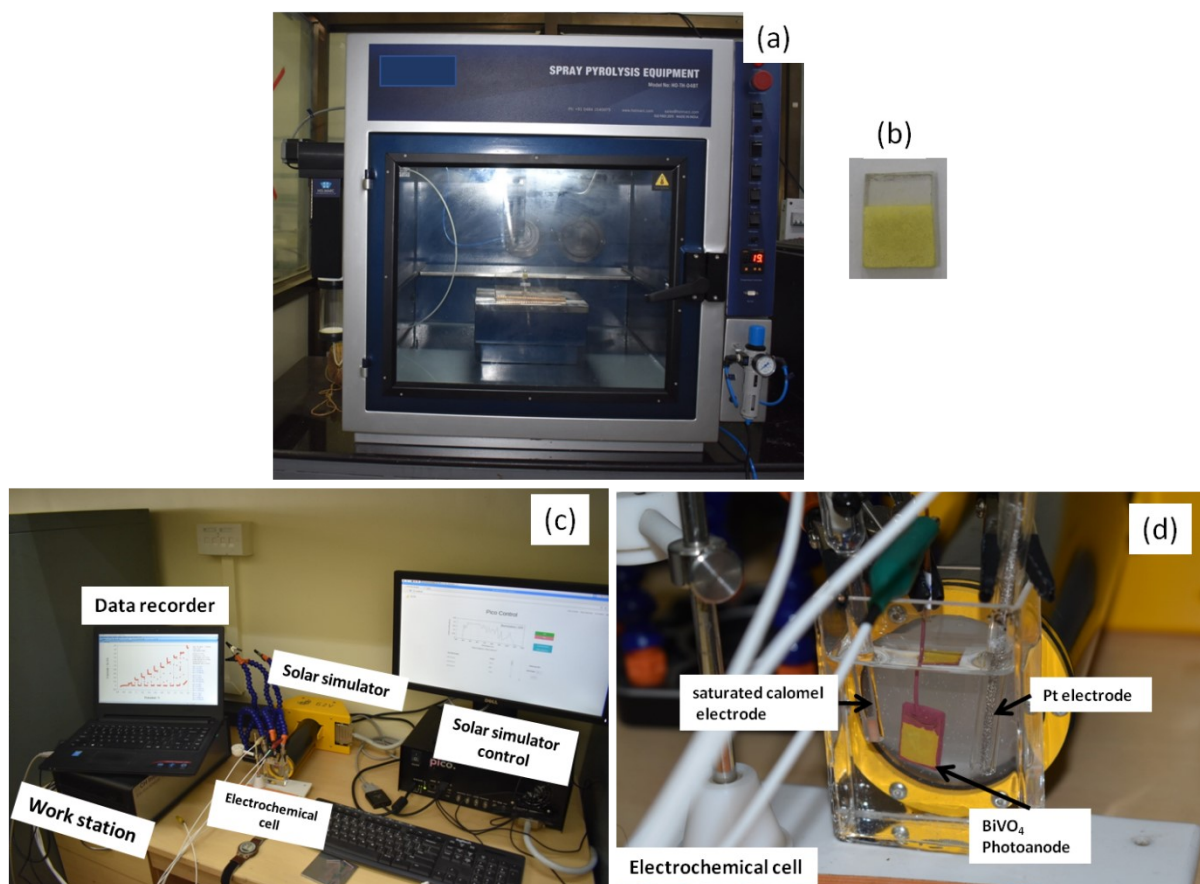

**Figure S1:** (a-b) Spray coating system and pictures of coated FTO substrates, respectively (c) Photoelectrochemical performance testing system (d) Electrochemical cell used for different BiVO<sub>4</sub> photoanode testing.

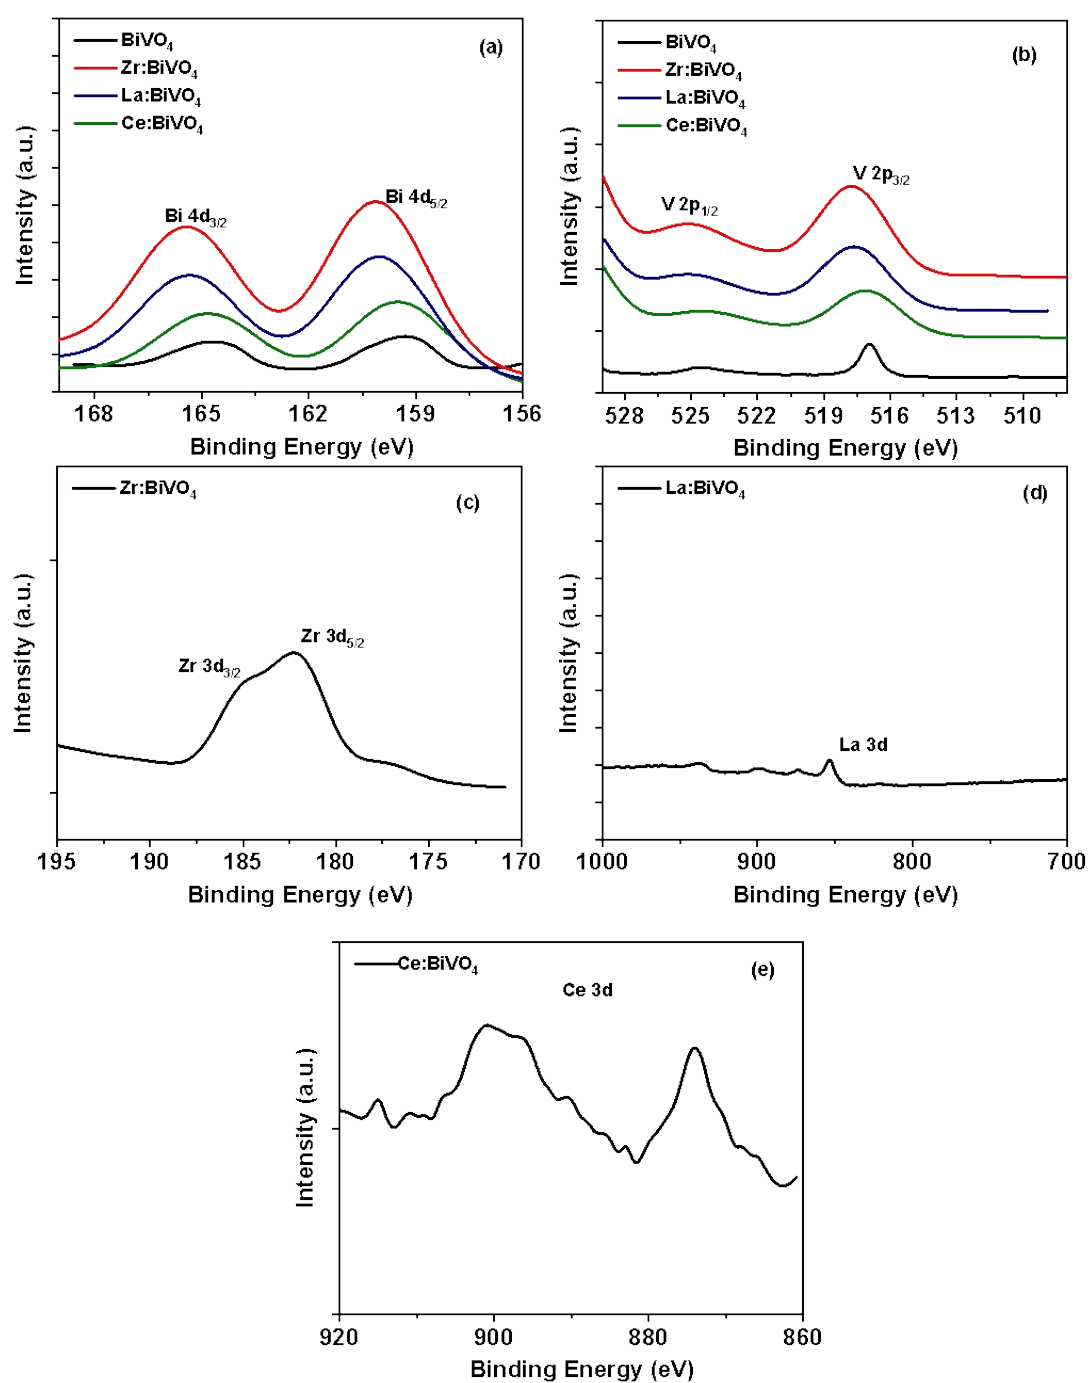

**Figure S2:** XPS data of different undoped/doped  $\text{BiVO}_4$  samples. As seen from peak positions, the oxidation states of Bi (4d<sub>3/2</sub>: 164.05 eV and 4d<sub>5/2</sub>: 160.03 eV), V (2p<sub>3/2</sub>: 517.19 eV, 2p<sub>1/2</sub>: 524.8 eV), Zr (3d<sub>3/2</sub>-3d<sub>5/2</sub>: 181.9-185.05 eV), La (3d: ~851 eV) and Ce (3d: 875-901 eV) are confirmed 3+, 5+, 3+, 3+ and 3+, respectively. The 3d peak positions

(binding energies) in Figure S2 c,d and e confirm that the oxidation states for Zr, La and Ce are 3+, 3+ and 3+, respectively substituting Bi<sup>3+</sup> sites in the doped samples.

### Charge separation and transfer efficiencies calculations

Influence of carbon nano materials in BiVO<sub>4</sub> photoanode on light absorption, charge separation and transfer efficiencies was examined using following equations:

$$J_{water} = J_{max} \times \eta_{inj} \times \eta_{sep} \quad (1)$$

$$J_{sulfite} = J_{max} \times \eta_{sep} \quad (2)$$

$$\text{Where } J_{max} = J_{theoretical} \times \eta_{abs} \quad (3)$$

Herein,  $J_{water}$ ,  $J_{sulfite}$  are PCD for water and sulfite oxidation, respectively,  $\eta_{inj}$ ,  $\eta_{sep}$  are charge transfer from film surface to electrolyte and bulk charge separation efficiencies, respectively,  $J_{theoretical}$  is maximum photocurrent density achievable assuming 100% IPCE for photons with energy  $\geq E_g$ ,  $\eta_{abs}$  is the absorption efficiency and obtained by integrating the product of the incident light spectral irradiance and the LHE. The LHE of each photoanode was calculated using following equation:

$$\text{LHE (\%)} = (1 - 10^{-A}) * 100 \quad (4)$$

For sulfite oxidation in equation 2, surface recombination is negligible due to extremely fast sulfite oxidation kinetics, therefore  $\eta_{inj} = \sim 1$ .

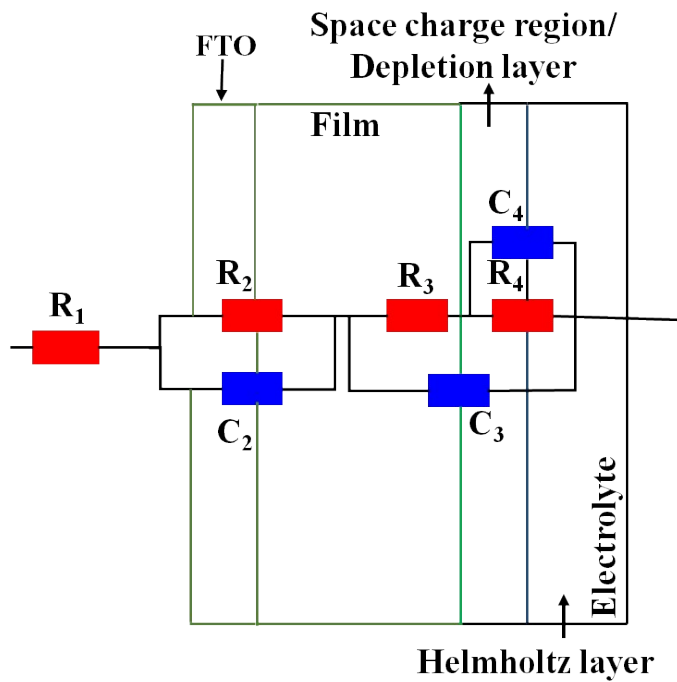

**Figure S3** Equivalent circuit used for fitting Nyquist plot and deriving corresponding resistance and capacitance. The equivalent circuit parameters are represented as:  $R_1$  is the resistance corresponding to contacts,  $R_2$  and  $C_2$  are the resistance and capacitance between film and FTO interface, the  $R_3$  and  $C_3$  are resistance and charge accumulation in bulk and it represent intrinsic properties of bulk photo active film,  $R_4$  and  $C_4$  are resistance and charge accumulation at film/electrolyte interface and it represent surface characteristic of photo active film.

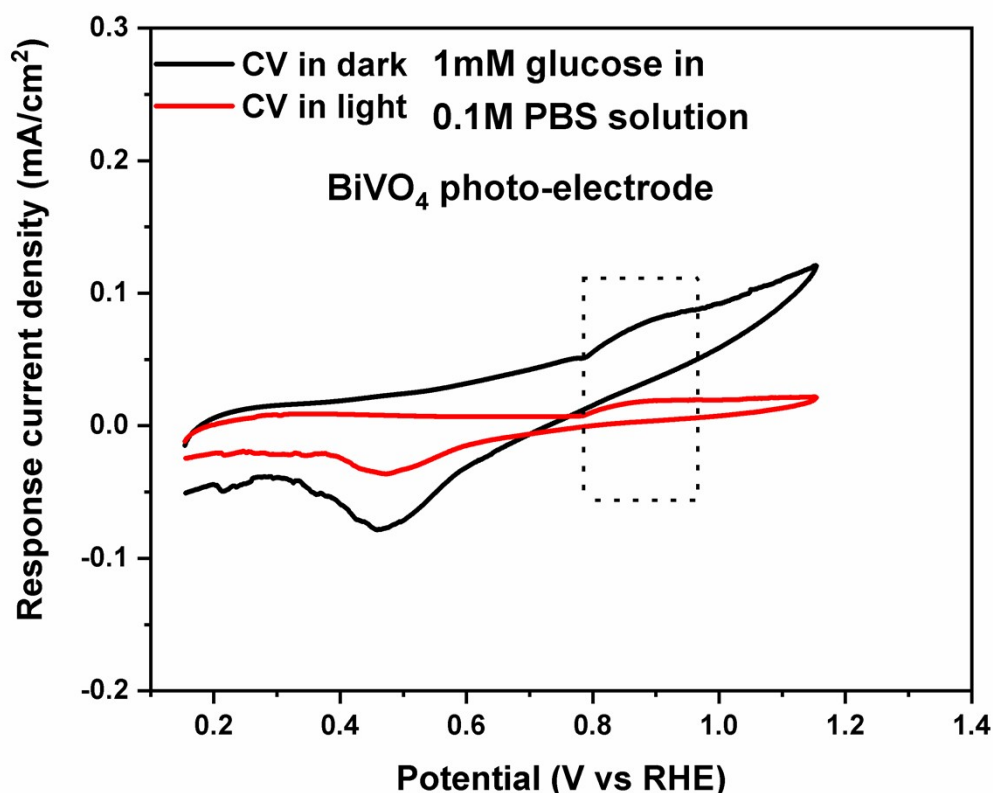

**Figure S4** The bare BiVO<sub>4</sub> photoanode showed weak peak corresponding to the oxidation of glucose.

#### **Details of the DFT simulation and results:**

The optimized lattice parameters and volume of pristine phase are in good agreement (< 3%) with the experimental results. The substitution of La and Ce slightly (< 1 %) increases volume of the pristine phase; while that of Ce in BiVO<sub>4</sub> decreases the volume by 4.5 %.

The GGA-PBE calculated band gap of all the phases are listed in column 2 of Supporting Table S5. It can be seen that the calculated band gap of pristine BiVO<sub>4</sub> is 2.187 eV which is lower than that obtained experimentally (2.54 eV). It is well known fact that GGA-PBE exchange correlation underestimates the band gap of system, especially for the systems with highly correlated *d* and *f* electrons. To improve the calculated band gap, we performed

DFT+U as well as hybrid functional calculations. In the DFT+U calculations, the ' $U_{\text{eff}}$  (U-J)' parameter was taken to be 2.7 eV which was suggested by T. Kim et al. [7]. However, it can be seen that this improves the band gap of the BiVO<sub>4</sub> phase, but still lower by 10 %. Therefore, we calculated the  $U_{\text{eff}}$  of *d*-electrons of V atom in BiVO<sub>4</sub> phase using the method suggested by Cococcioni et al. [8]. It has been found that the  $U_{\text{eff}}$  on the *d*-electrons of V atoms should be 6.37 eV. It can be seen that the band gap of the system is hugely improved by introducing  $U_{\text{eff}}=6.37$  eV. The band gap of BiVO<sub>4</sub> phase, calculated using HSE06 functional, is in very good agreement (within 1%) with the experimental band gap. It can be seen from Supporting Table S5 that the substitution of La and Ce in BiVO<sub>4</sub> phase increases the band gap; while that of Zr decreases the band gap.

#### References:

1. G. Kresse and J. Hafner, Phys. Rev. B, 48 (1993), 13115
2. G. Kresse and J. Furthmüller, Phys. Rev. B, 54 (1996), 11169
3. P. E. Blöchl, Phys. Rev. B, 50 (1994), 17953
4. J. P. Perdew, K. Burke, M. Ernzerhof, Phys. Rev. Lett., 77 (1996), 3865
5. S. Dudarev, G. Botton, S. Savrasov, C. Humphreys, A. Sutton, Phys. Rev. B: Condens. Matter Mater. Phys., 57 (1998), 1505
6. A. V. Krukau , O. A. Vydrov, A. F. Izmaylov, and G. E. Scuseria, J. Chem. Phys. 125 (2006), 224106
7. T. Kim, Y. Ping, G. Galli, K. Choi, Nat. Commun., 6 (2015), 8769
8. M. Cococcioni and S. de Gironcoli, Phys. Rev. B, 71 (2005), 035105

**Table S1** Cell parameters evaluated from theoretical simulation and Rietveld refinement for pristine BiVO<sub>4</sub>, La:BiVO<sub>4</sub>, Zr:BiVO<sub>4</sub>, Ce:BiVO<sub>4</sub> samples.( Experimental results are given in the braces.)

| Photoanode           | Lattice parameter, a (Å) | Lattice parameter, b (Å) | Lattice parameter, c (Å) | Angle (Degree)     | Volume, (Å <sup>3</sup> ) | Average Peak position of (-121)/(121) |
|----------------------|--------------------------|--------------------------|--------------------------|--------------------|---------------------------|---------------------------------------|
| BiVO <sub>4</sub>    | 5.172<br>{5.186}         | 5.164<br>{5.110}         | 11.765<br>{11.690}       | 89.928<br>{89.927} | 314.18<br>{309.790}       | 28.90                                 |
| La:BiVO <sub>4</sub> | 5.192<br>{5.185}         | 5.172<br>{5.107}         | 11.831<br>{11.680}       | 90.088<br>{89.998} | 317.70<br>{309.284}       | 29.00                                 |
| Zr:BiVO <sub>4</sub> | 5.101<br>{5.183}         | 5.098<br>{5.106}         | 11.553<br>{11.675}       | 89.994<br>{89.990} | 300.44<br>{308.971}       | 29.07                                 |
| Ce:BiVO <sub>4</sub> | 5.198<br>{5.185}         | 5.172<br>{5.109}         | 11.822<br>{11.684}       | 90.032<br>{89.997} | 318.00<br>{309.511}       | 28.96                                 |

**Table S2** Band gap estimated from a Tauc plot depicting (F(R)hν)<sup>2</sup> versus hν by the application of Kubelka-Munk's function.

| Photoanode | Calculated Band Gap |
|------------|---------------------|
|            |                     |

|                      |                        |
|----------------------|------------------------|
|                      | from Tauc<br>Plot (eV) |
| BiVO <sub>4</sub>    | 2.54                   |
| La:BiVO <sub>4</sub> | 2.55                   |
| Zr:BiVO <sub>4</sub> | 2.43                   |
| Ce:BiVO <sub>4</sub> | 2.57                   |

**Table S3** The flat band potential and number of bulk charge carriers in pristine and doped BiVO<sub>4</sub> photoanodes as calculated from the Mott–Schottky (M–S) analysis.

| Electrodes           | Flat Band Potential (V) | Charge Carrier Concentration, N <sub>D</sub> (cm <sup>-3</sup> ) |
|----------------------|-------------------------|------------------------------------------------------------------|
| BiVO <sub>4</sub>    | 0.43                    | 4.97354E+18                                                      |
| Zr:BiVO <sub>4</sub> | 0.29                    | 1.02397E+19                                                      |
| La:BiVO <sub>4</sub> | 0.34                    | 8.28924E+18                                                      |
| Ce:BiVO <sub>4</sub> | 0.39                    | 6.69516E+18                                                      |

**Table S4** Different resistance involved in the PEC process of photoanode, obtained using a simulated circuit model.

| Electrodes           | charge transfer resistance | bulk resistance |
|----------------------|----------------------------|-----------------|
| BiVO <sub>4</sub>    | 3209                       | 920             |
| Zr:BiVO <sub>4</sub> | 2010                       | 759             |
| La:BiVO <sub>4</sub> | 2409                       | 940             |



|                      |      |      |
|----------------------|------|------|
| Ce:BiVO <sub>4</sub> | 2691 | 1059 |
|----------------------|------|------|

**Table S5.** GGA+U (U<sub>eff</sub> =6.37 eV) calculated band gap of pristine and La, Ce and Zr doped phase. Experimental band gaps are also listed.

| Phase                | Band gap (eV)  |              |
|----------------------|----------------|--------------|
|                      | DFT calculated | Experimental |
| BiVO <sub>4</sub>    | 2.585          | 2.540        |
| La:BiVO <sub>4</sub> | 2.686          | 2.500        |
| Ce:BiVO <sub>4</sub> | 2.683          | 2.510        |
| Zr:BiVO <sub>4</sub> | 2.446          | 2.430        |
